# Supplementary material for: Solvents and their hydrogen bonding properties as general considerations in carbon dioxide reduction by molecular catalysts
Source: Royal Society of Chemistry journal article supplement (doi:10.1039/d4dt02682a), 2024-12-20
Supplement: d4dt02682a1.pdf [file d4dt02682a1.pdf]

*Supporting Information for:*

# Solvents and their hydrogen bonding properties as general considerations in carbon dioxide reduction by molecular catalysts

*Xiaohan Li and Jeffrey J. Warren\**

Department of Chemistry  
Simon Fraser University,  
8888 University Drive, Burnaby BC V5A 1S6, Canada  
[\\*jjwarren@sfu.ca](mailto:*jjwarren@sfu.ca)

## Contents

|                                                                                      |   |
|--------------------------------------------------------------------------------------|---|
| Instrumentation .....                                                                | 2 |
| Characterization of complexes.....                                                   | 2 |
| Determination of $k_{\text{obs}}$ .....                                              | 3 |
| Potential correction to H <sub>2</sub> .....                                         | 3 |
| Cyclic voltammograms under argon.....                                                | 4 |
| Cyclic voltammograms versus ferrocenium/ferrocene (Fc <sup>+0</sup> ) reference..... | 6 |
| DOSY NMR spectra .....                                                               | 8 |

## Instrumentation

<sup>1</sup>H NMR spectra were collected on a Bruker Avance III 400 MHz spectrometer. <sup>1</sup>H DOSY data were collected on Avance II 600 MHz spectrometer equipped with a 5 mm Bruker QNP cryoprobe. <sup>19</sup>F DOSY data were collected on Avance II 600 MHz spectrometer (<sup>19</sup>F frequency = 564.97 MHz) equipped with a 5 mm Bruker QCI cryoprobe. Diffusion coefficients were obtained using MesterNova's built-in Bayesian DOSY transform algorithm following the user manual. Infrared spectra were collected on a Perkin Elmer Spectrum 2 FT-IR equipped with an attenuated total reflectance (ATR) accessory (germanium crystal: 4000-700 cm<sup>-1</sup>). IR samples were recorded using pure solid samples. UV-vis spectra were collected using a Cary 100Bio spectrometer.

## Characterization of complexes

**BrRe(CO<sub>3</sub>)(2,2'-bipyridine).**<sup>1</sup> <sup>1</sup>H NMR (400 MHz, CD<sub>3</sub>CN): δ = 7.63 (ddd, 2H); 8.19 (td, 2H); 8.43 (dt, 2H); 9.04 (d, 2H). ATR-FTIR (cm<sup>-1</sup>): 2009, 1871. UV-vis: 370 nm (MLCT)

**BrRe(CO<sub>3</sub>)(4,4'-dimethoxy-2,2'-bipyridine).**<sup>2</sup> <sup>1</sup>H NMR (400 MHz, CD<sub>3</sub>CN): δ = 4.04 (s, 6H), 7.13 (dd, 2H); 7.89 (d, 2H); 8.78 (d, 2H). ATR-FTIR (cm<sup>-1</sup>): 2020, 1877. UV-vis: 356 nm (MLCT)

**BrRe(CO<sub>3</sub>)(4,4'-di-*tert*-butyl-2,2'-bipyridine).**<sup>3</sup> <sup>1</sup>H NMR (400 MHz, CD<sub>3</sub>CN): δ = 1.45 (s, 18H), 7.64 (dd, 2H); 8.41 (d, 2H); 8.90 (d, 2H). ATR-FTIR (cm<sup>-1</sup>): 2019, 1886, 1876. UV-vis: 365 nm (MLCT)

**BrRe(CO<sub>3</sub>)(2-(2'-quinolyl)benzimidazole).**<sup>4</sup> <sup>1</sup>H NMR (400 MHz, 80% CD<sub>3</sub>CN + 20% DMSO-d<sub>6</sub>): δ = 7.57 (m, 2H); 7.81 (m, 1H); 7.86 (m, 1H); 8.03 (m, 1H); 8.10 (ddd 1H); 8.18 (dd, 1H); 8.60 (d, 1H); 8.84 (dd, 2H). ATR-FTIR (cm<sup>-1</sup>): 2017, 1901. UV-vis: 353 (shoulder) and 365 nm (MLCT)

**Determination of  $k_{obs}$** 

$$\frac{i_{cat}}{i_p} = \frac{1}{0.446} \sqrt{\frac{n'RT}{nFv}} k_{obs} \quad (1)$$

The ratio of the catalytic peak current densities ( $i_{cat}$ ,  $i_p$ ) is obtained from the cyclic voltammograms. Then  $k_{obs}$ , the intrinsic catalytic rate constant, can be solved by using equation 1, where R is the universal gas constant ( $R=8.3144598 \text{ J mol}^{-1} \text{ K}^{-1}$ ), T is the temperature in kelvin (K), F is the Faraday constant ( $F=96485.3321 \text{ s A mol}^{-1}$ ), v is scan rate (all CVs collected in this paper were collected at  $v=0.1 \text{ V}$ ), n is the number of electrons transferred from the electrode per catalyst ( $n = 2$ ),  $n'$  is the catalyst required for complete turnover ( $n' = 1$ ).

**Potential correction to H<sub>2</sub>**

$$Correction = E - E(Fc) + E(H_2) + 0.591(pK_a) \quad (2)$$

E in this equation represents the original potential values obtained from the CV measurements. The first correction component is the ferrocene standard versus silver ( $E(Fc)$ ), this number varies depending on the solvent and time of CV collection. The following is the correction of  $H^+/H_2$  versus ferrocene ( $E(H_2)$ ), in DMF is  $-0.662 \text{ V}$  and in acetonitrile is  $-0.028 \text{ V}$ . The last correction for phenol involves the  $pK_a$  of the solvent ( $pK_a(\text{DMF})=18.9$ ,  $pK_a(\text{MeCN})=29$ ), this component is excluded for CVs obtained under argon.

**Cyclic voltammograms under argon**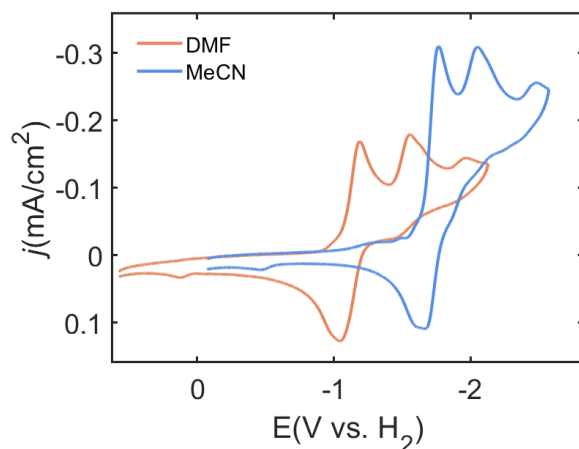

**Figure S1.** Cyclic voltammograms for BrRe(CO)<sub>3</sub>bpy (1 mM) in DMF and acetonitrile under argon. Scan rate was 100 mV s<sup>-1</sup> and the supporting electrolyte was 100 mM <sup>n</sup>Bu<sub>4</sub>NPF<sub>6</sub>.

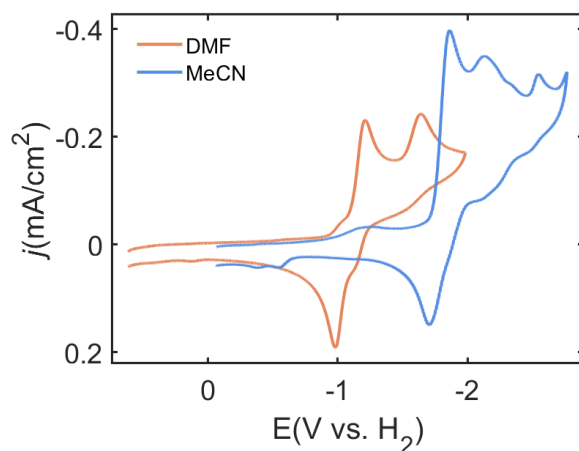

**Figure S2.** Cyclic voltammograms for BrRe(CO)<sub>3</sub><sup>t</sup>Bubpy (1 mM) in DMF and acetonitrile under argon. Scan rate was 100 mV s<sup>-1</sup> and the supporting electrolyte was 100 mM <sup>n</sup>Bu<sub>4</sub>NPF<sub>6</sub>.

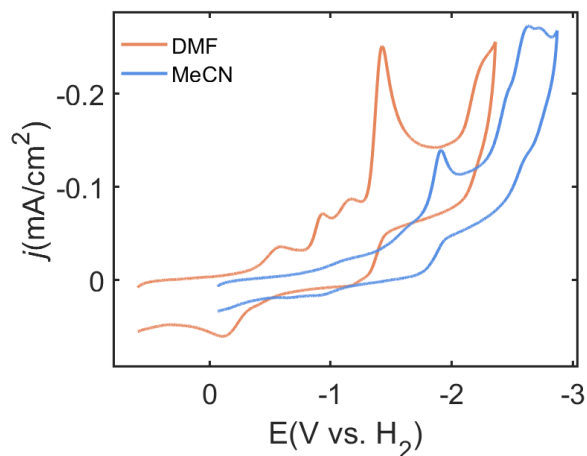

**Figure S3.** Cyclic voltammograms for BrRe(CO)<sub>3</sub>QuBlm (1 mM) in DMF and acetonitrile under argon. Scan rate was 100 mV s<sup>-1</sup> and the supporting electrolyte was 100 mM <sup>n</sup>Bu<sub>4</sub>NPF<sub>6</sub>.

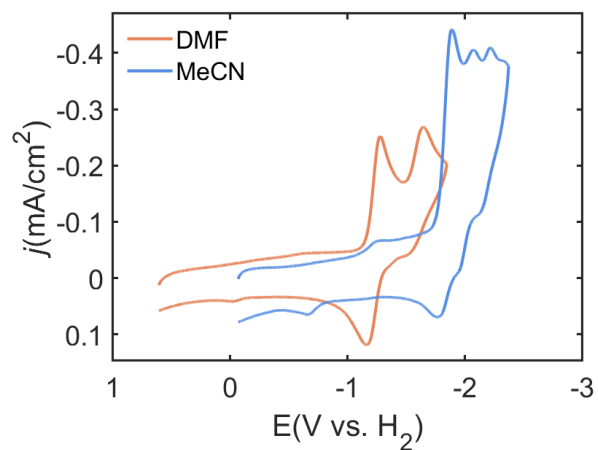

**Figure S4.** Cyclic voltammograms for BrRe(CO)<sub>3</sub>OMe<sub>2</sub>bpy (1 mM) in DMF and acetonitrile under argon. Scan rate was 100 mV s<sup>-1</sup> and the supporting electrolyte was 100 mM <sup>n</sup>Bu<sub>4</sub>NPF<sub>6</sub>.

**Cyclic voltammograms versus ferrocenium/ferrocene (Fc<sup>+0</sup>) reference**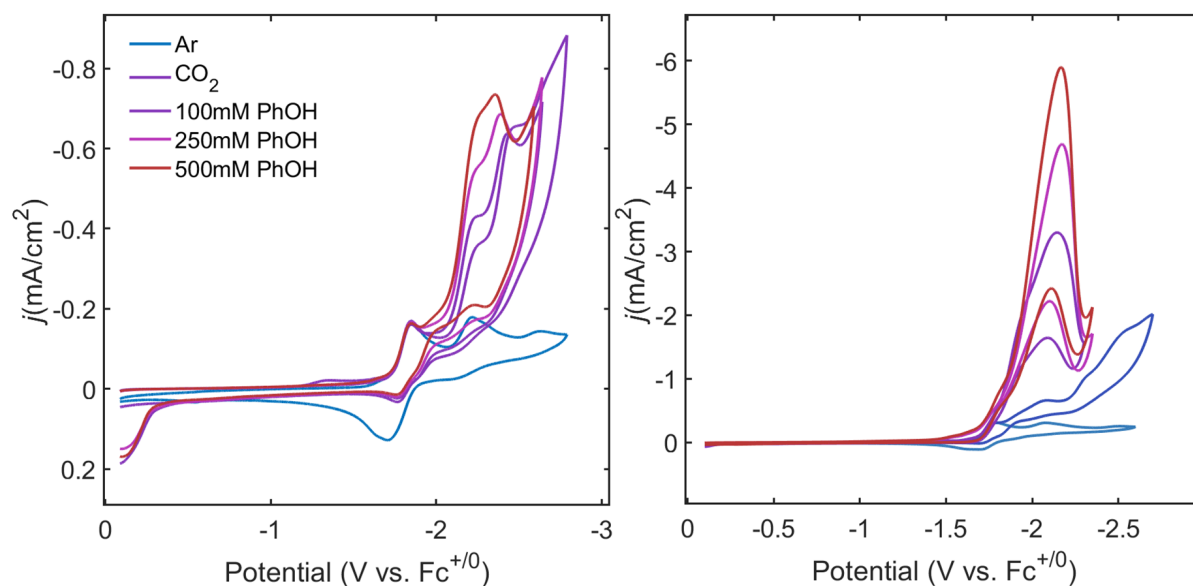

**Figure S5.** CV data BrRe(CO)<sub>3</sub>bpy in DMF (left) and acetonitrile (right) with respect to the ferrocenium/ferrocene (Fc<sup>+0</sup>) couple.

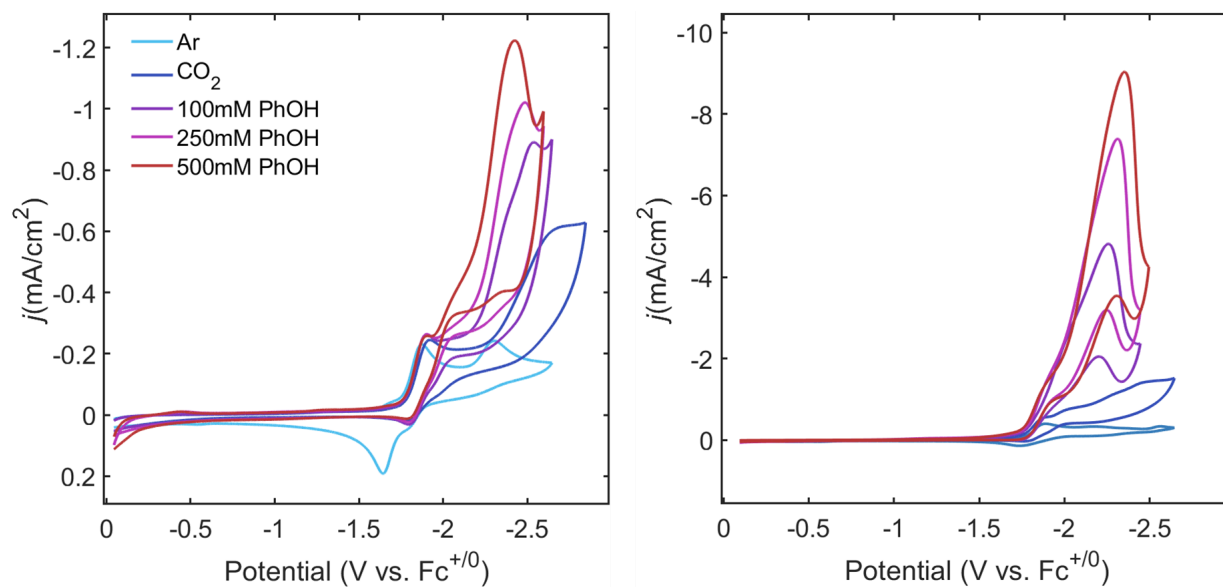

**Figure S6.** BrRe(CO)<sub>3</sub>'Bubpy in DMF (left) and acetonitrile (right) with respect to the ferrocenium/ferrocene (Fc<sup>+0</sup>) couple.

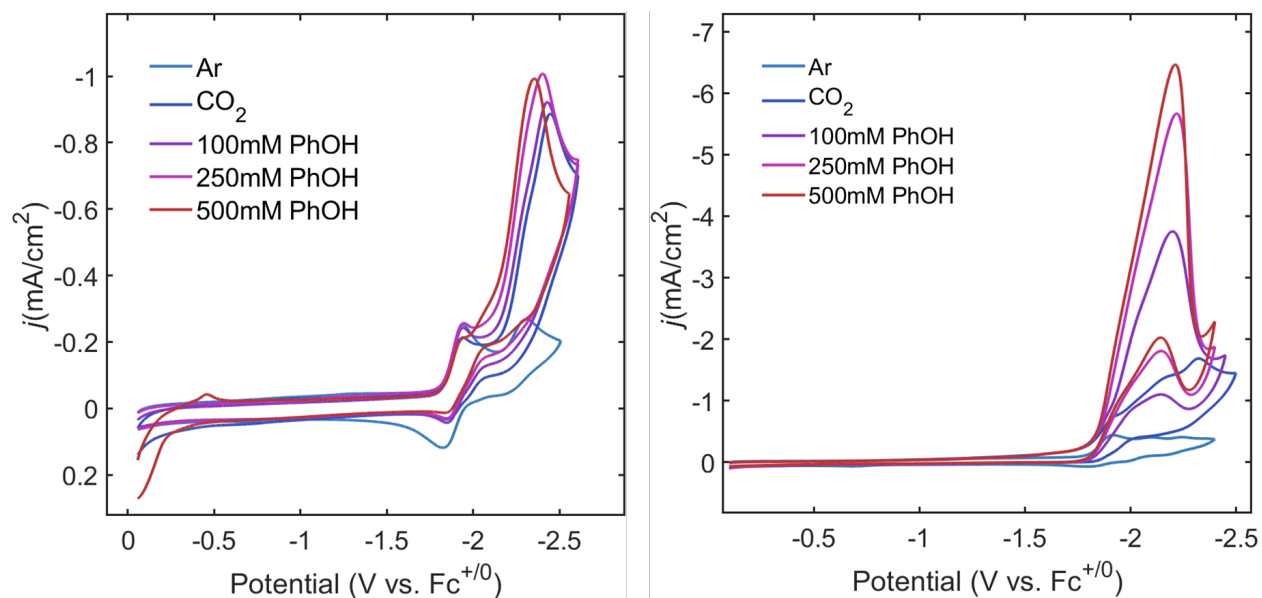

**Figure S7.** BrRe(CO)<sub>3</sub>OMebpy in DMF (left) and acetonitrile (right) with respect to the ferrocenium/ferrocene (Fc<sup>+0</sup>) couple.

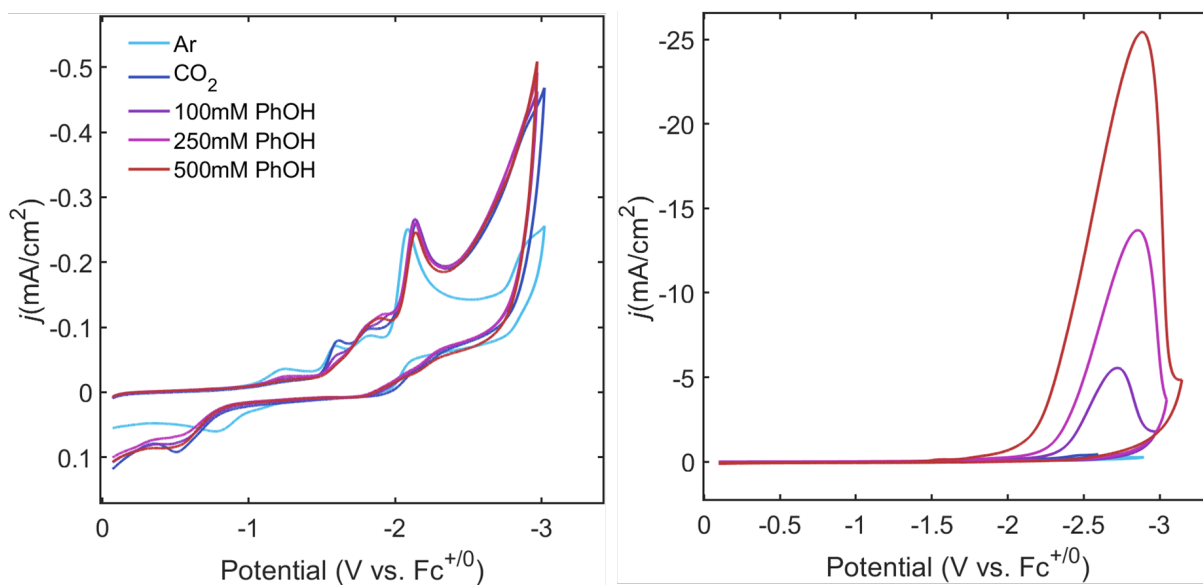

**Figure S8.** BrRe(CO)<sub>3</sub>QuBIm in DMF (left) and acetonitrile (right) with respect to the ferrocenium/ferrocene (Fc<sup>+0</sup>) couple.

**DOSY NMR spectra**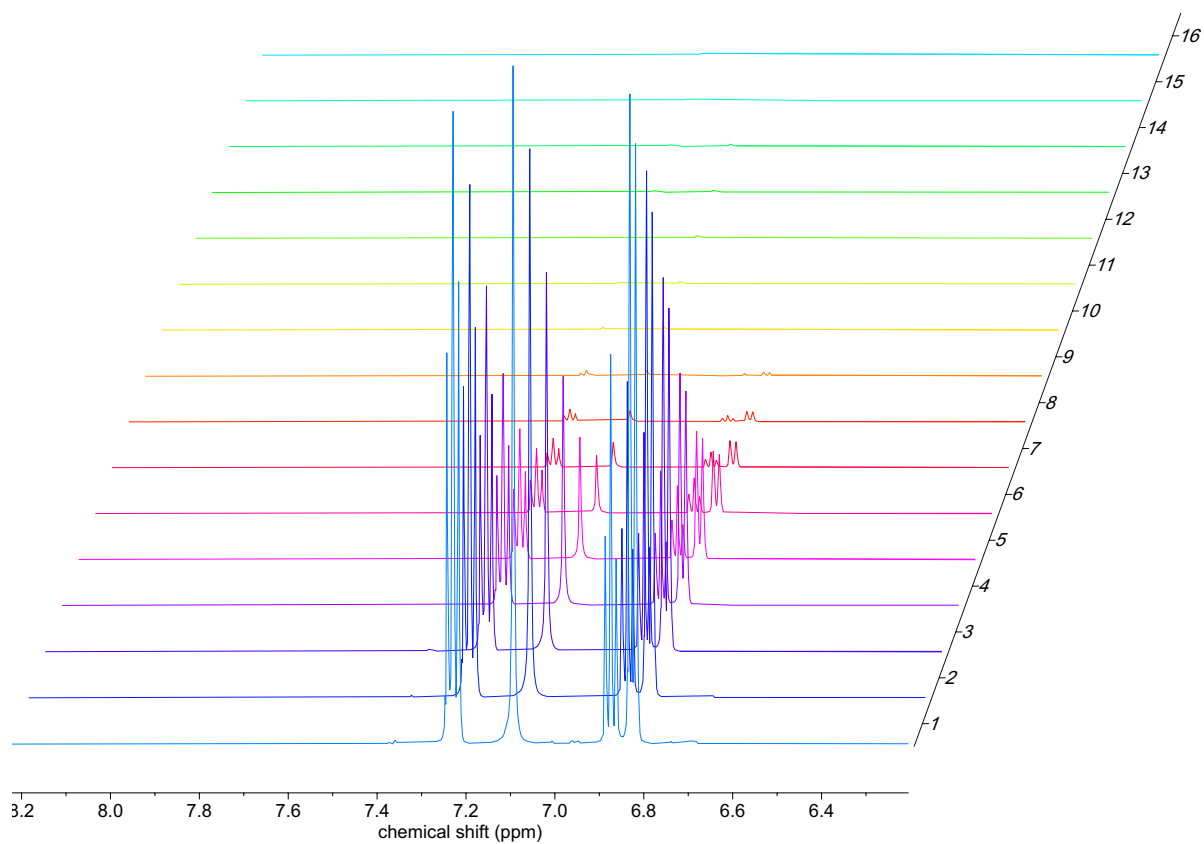

**Figure S9.** <sup>1</sup>H DOSY spectra of phenol in CD<sub>3</sub>CN.



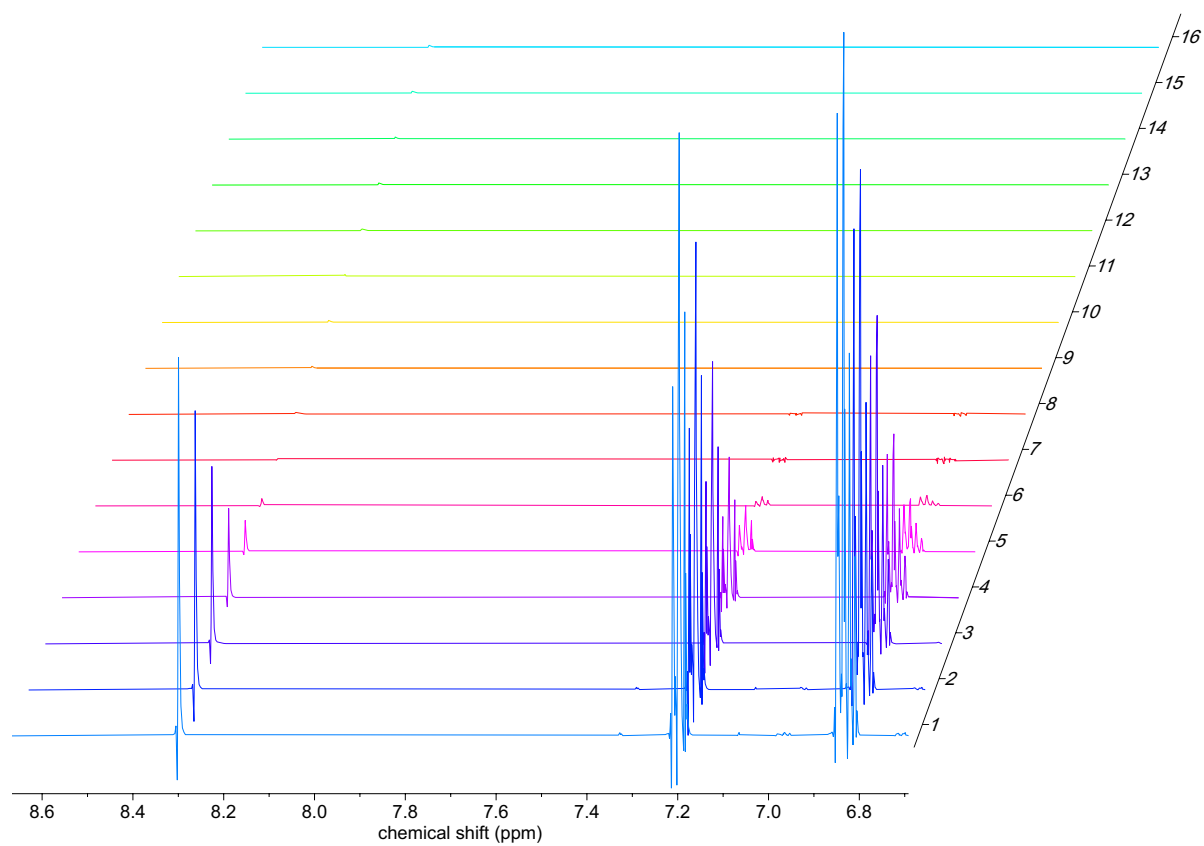

**Figure S10.** <sup>1</sup>H DOSY spectra of phenol in (CD<sub>3</sub>)<sub>2</sub>CO.

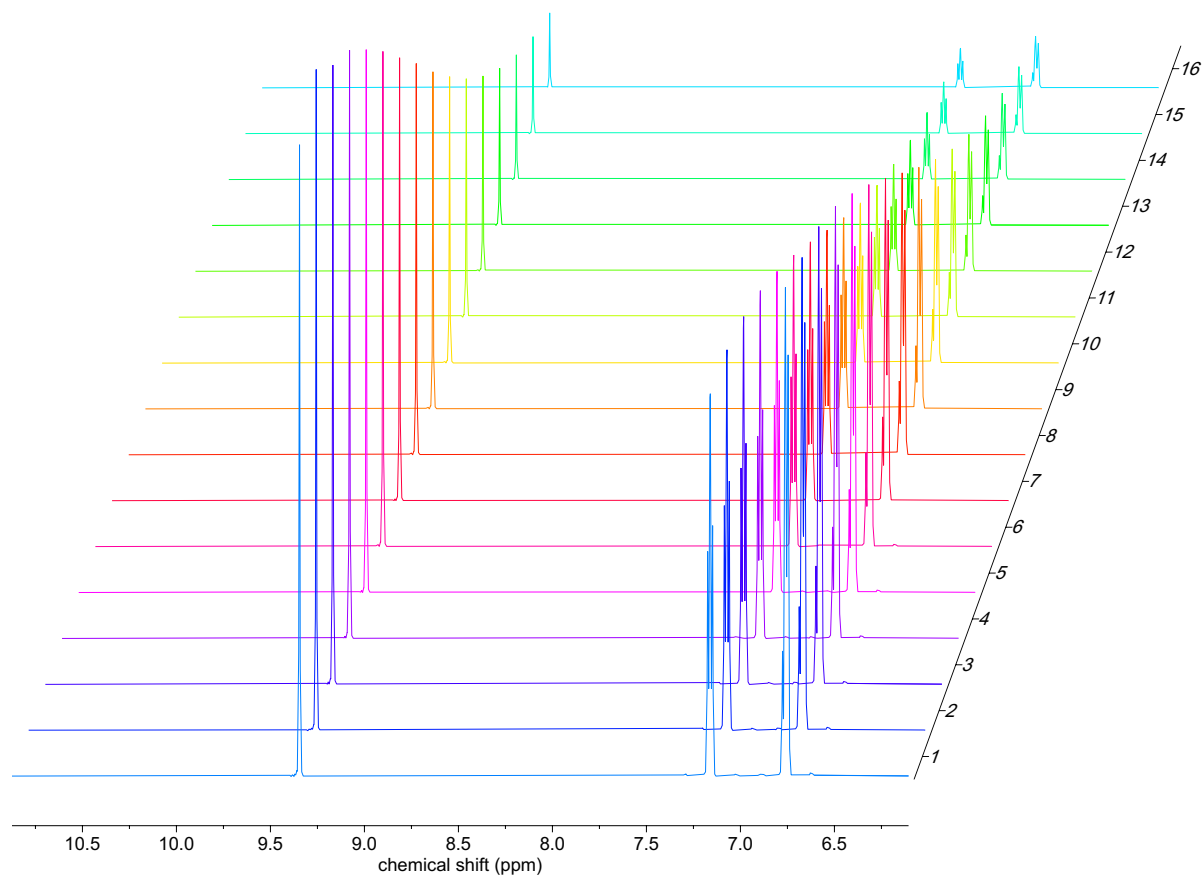

**Figure S11.** <sup>1</sup>H DOSY spectra of phenol in (CD<sub>3</sub>)<sub>2</sub>SO.

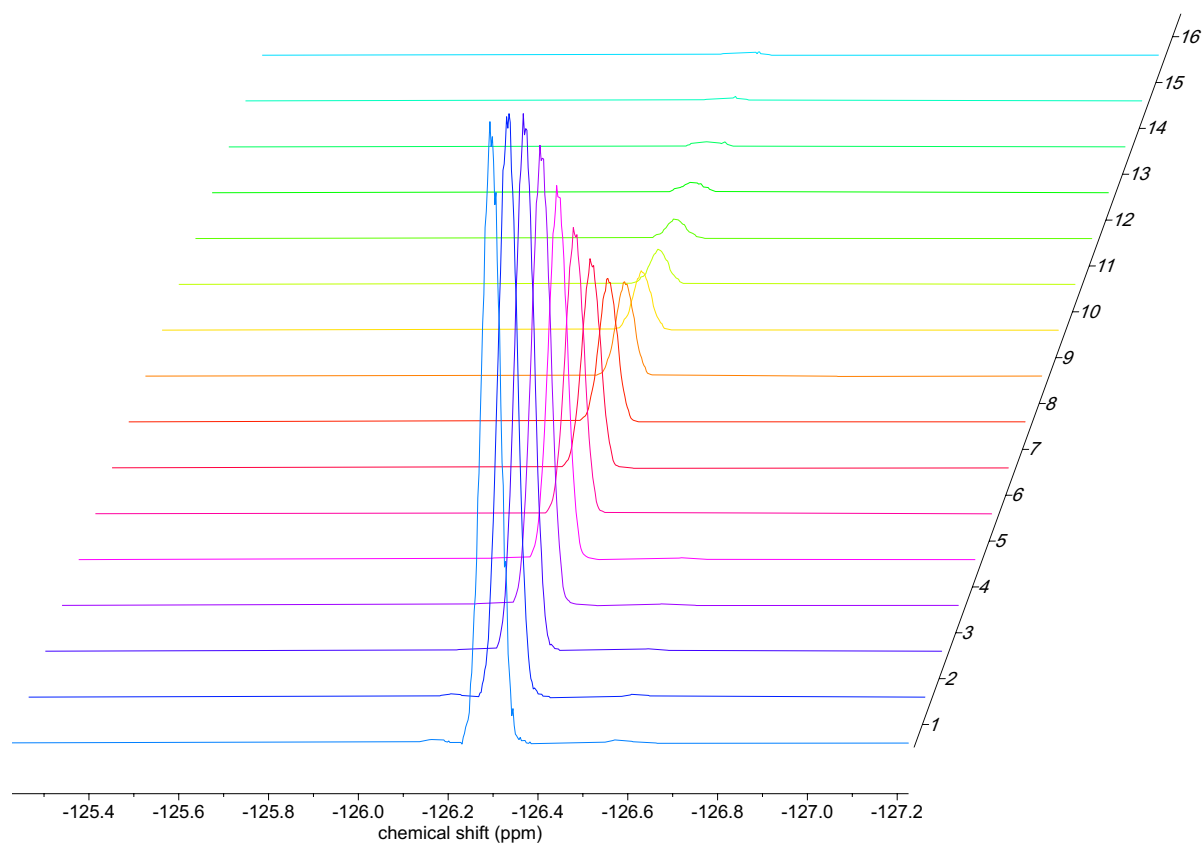

**Figure S12.** <sup>19</sup>F DOSY spectra of 4-fluorophenol in CH<sub>3</sub>CN.

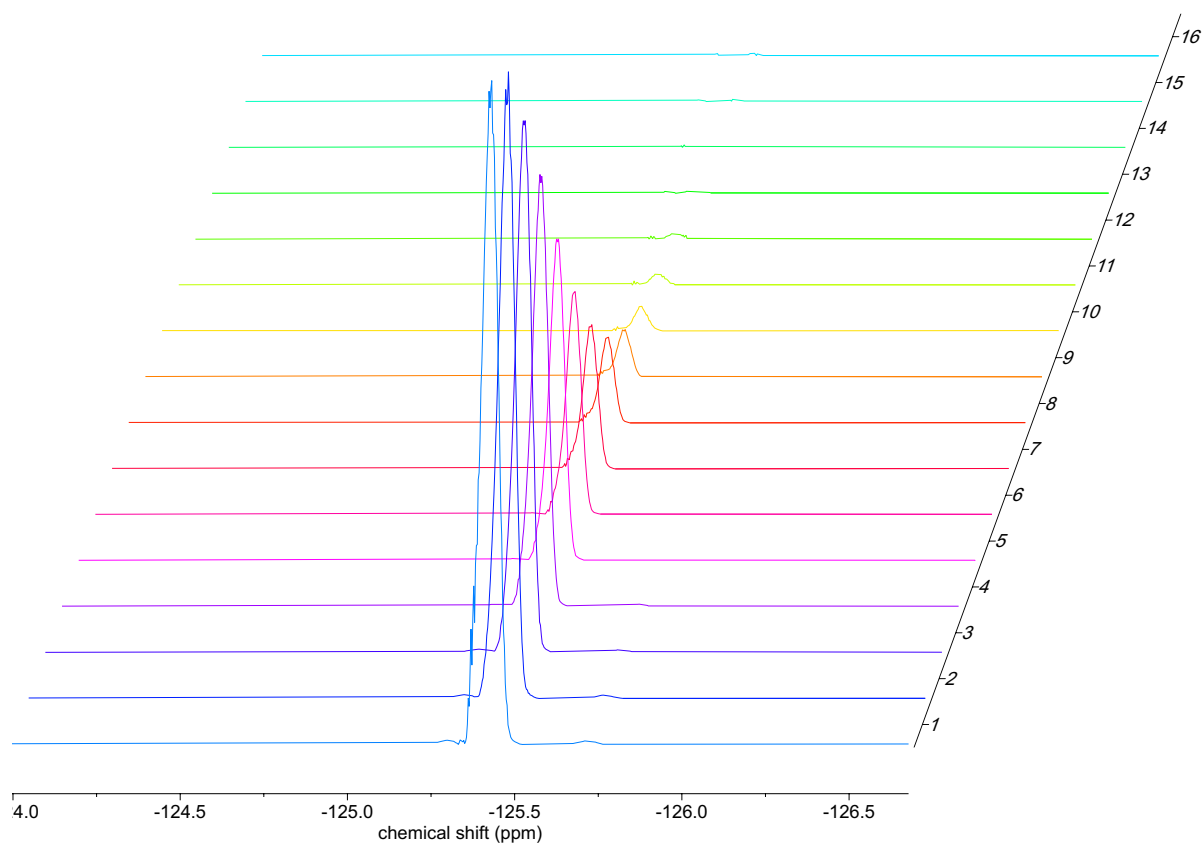

**Figure S13.** <sup>19</sup>F DOSY spectra of 4-fluorophenol in CH<sub>3</sub>CN.
